# Supplementary material for: Reduced NRF2 expression suppresses endothelial progenitor cell function and induces senescence during aging
Source: publisher site journal article supplement (doi:10.18632/aging.102234), 2019-09-08
Supplement: Supplementary file [file aging-v11i17-102234-supplementary-material-SD1.pdf]

## SUPPLEMENTARY FIGURE

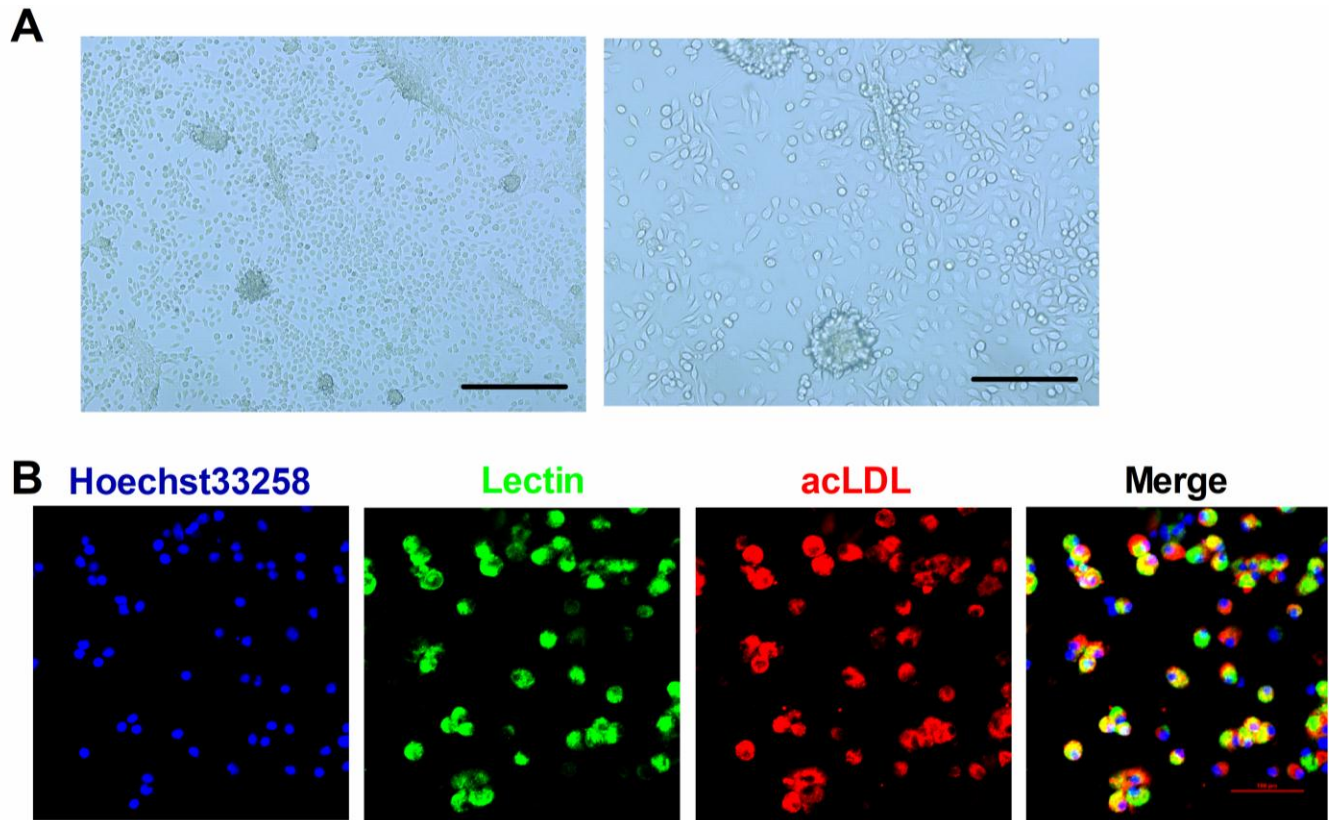

**Supplementary Figure 1. Characterization of early EPCs.** (A) The isolated mononuclear cells became spindle-shaped following 7 days of culture. Scale bar: 500 (left) and 200 (right)  $\mu\text{m}$ . (B) The EPCs were identified as double positive for Dil-acLDL (red) and lectin (green) following 7 days of culture. Scale bar: 100  $\mu\text{m}$ .
